# Supplementary material
Source: HighWire-hosted journal article supplement (https://bmjopen.bmj.com/content/12/7/e051726)
Supplement: inline-supplementary-material-1 [file inline-supplementary-material-1.pdf]

**Supplementary file 1: Core Outcome Set-STandards Protocol Items: The COS-STAP Statement Checklist**

| SECTION/TOPIC                    | ITEM No. | CHECKLIST ITEM                                                                                                                                                                                                                                                                        | REPORTED ON PAGE NUMBER |
|----------------------------------|----------|---------------------------------------------------------------------------------------------------------------------------------------------------------------------------------------------------------------------------------------------------------------------------------------|-------------------------|
| <b>TITLE/ABSTRACT</b>            |          |                                                                                                                                                                                                                                                                                       |                         |
| Title                            | 1a       | Identify in the title that the paper describes the protocol for the planned development of a COS                                                                                                                                                                                      | 1                       |
| Abstract                         | 1b       | Provide a structured abstract                                                                                                                                                                                                                                                         | 2                       |
| <b>INTRODUCTION</b>              |          |                                                                                                                                                                                                                                                                                       |                         |
| Background and objectives        | 2a       | Describe the background and explain the rationale for developing the COS, and identify the reasons why a COS is needed and the potential barriers to its implementation                                                                                                               | 4,5                     |
|                                  | 2b       | Describe the specific objectives with reference to developing a COS                                                                                                                                                                                                                   | 5                       |
| Scope                            | 3a       | Describe the health condition(s) and population(s) that will be covered by the COS                                                                                                                                                                                                    | 5, 6                    |
|                                  | 3b       | Describe the intervention(s) that will be covered by the COS                                                                                                                                                                                                                          | 5                       |
|                                  | 3c       | Describe the context of use for which the COS is to be applied                                                                                                                                                                                                                        | 5                       |
| <b>METHODS</b>                   |          |                                                                                                                                                                                                                                                                                       |                         |
| Stakeholders                     | 4        | Describe the stakeholder groups to be involved in the COS development process, the nature of and rationale for their involvement and also how the individuals will be identified; this should cover involvement both as members of the research team and as participants in the study | 5-10                    |
| Information sources              | 5a       | Describe the information sources that will be used to identify the list of outcomes. Outline the methods or reference other protocols/papers                                                                                                                                          | 6-8                     |
|                                  | 5b       | Describe how outcomes may be dropped/combined, with reasons                                                                                                                                                                                                                           | 8, 9                    |
| Consensus process                | 6        | Describe the plans for how the consensus process will be undertaken                                                                                                                                                                                                                   | 11-13                   |
| Consensus definition             | 7a       | Describe the consensus definition                                                                                                                                                                                                                                                     | 11 (+ table 1)          |
|                                  | 7b       | Describe the procedure for determining how outcomes will be added/combined/dropped from consideration during the consensus process                                                                                                                                                    | 10-13                   |
| <b>ANALYSIS</b>                  |          |                                                                                                                                                                                                                                                                                       |                         |
| Outcome scoring/feedback         | 8        | Describe how outcomes will be scored and summarised, describe how participants will receive feedback during the consensus process                                                                                                                                                     | 11                      |
| Missing data                     | 9        | Describe how missing data will be handled during the consensus process                                                                                                                                                                                                                | 10                      |
| <b>ETHICS and DISSEMINATION</b>  |          |                                                                                                                                                                                                                                                                                       |                         |
| Ethics approval/informed consent | 10       | Describe any plans for obtaining research ethics committee/institutional review board approval in relation to the consensus process and describe how informed consent will be obtained (if relevant)                                                                                  | 13, 14                  |

|                            |    |                                                                                                                                     |    |
|----------------------------|----|-------------------------------------------------------------------------------------------------------------------------------------|----|
| Dissemination              | 11 | Describe any plans to communicate the results to study participants and COS users, inclusive of methods and timing of dissemination | 13 |
| ADMINISTRATIVE INFORMATION |    |                                                                                                                                     |    |
| Funders                    | 12 | Describe sources of funding, role of funders                                                                                        | 18 |
| Conflicts of interest      | 13 | Describe any potential conflicts of interest                                                                                        | 18 |

*From: Kirkham JJ, Gorst S, Altman DG, et al. (2019) Core Outcome Set-STandardised Protocol Items: the COS-STAP Statement. Trials 20, 116. <https://doi.org/10.1186/s13063-019-3230-x>*
