# Supplementary material
Source: HighWire-hosted journal article supplement (https://bmjopen.bmj.com/content/12/7/e051726)
Supplement: inline-supplementary-material-2 [file inline-supplementary-material-2.pdf]

**Supplementary file 2.** Standardised data extraction sheet

| Author (year)               | Country        | Study design                                   | Participant characteristics                               |                                                        | Intervention characteristics |                                 | Outcome characteristics    |                                                 |                                                          |
|-----------------------------|----------------|------------------------------------------------|-----------------------------------------------------------|--------------------------------------------------------|------------------------------|---------------------------------|----------------------------|-------------------------------------------------|----------------------------------------------------------|
|                             |                |                                                | Intervention                                              | Control                                                | Focus                        | Duration                        | Outcome(s)                 | Measurement tool                                | Measurement time points                                  |
| <i>Author et al. (year)</i> | <i>Country</i> | <i>Design of intervention evaluation study</i> | <i>Number, age (mean <math>\pm</math> SD) and % girls</i> | <i>Number, age (mean <math>\pm</math> SD), % girls</i> | <i>Focus of intervention</i> | <i>Duration of intervention</i> | <i>Outcome(s) reported</i> | <i>Tool used to measure reported outcome(s)</i> | <i>Time points at which outcome(s) is (are) measured</i> |

RCT, randomized controlled trial; SD, standard deviation
